# Supplementary material for: Structures of human gastrin-releasing peptide receptors bound to antagonist and agonist for cancer and itch therapy
Source: PubMed Central journal article supplement — Proc Natl Acad Sci U S A. 2023 Feb 1;120(6):e2216230120. doi: 10.1073/pnas.2216230120 (PMC9963752; doi:10.1073/pnas.2216230120), 2023-02-01
Supplement: pnas.2216230120.sapp.pdf [file pnas.2216230120.sapp.pdf]

2 **Supplementary Information for**

3  
4  
5 **Structures of Human Gastrin-Releasing Peptide Receptors Bound to**  
6 **Antagonist and Agonist for Cancer and Itch Therapy.**

7  
8 Shuman Peng<sup>1</sup>, Yuting Zhan<sup>1</sup>, Dongqi Zhang<sup>1</sup>, Lu Ren<sup>1</sup>, Anqi Chen<sup>1</sup>, Xiaokun Shen<sup>2</sup>, Zhoufeng  
9 Chen<sup>3</sup>, Haitao Zhang<sup>1,4,\*</sup>.

10 <sup>1</sup>Hangzhou Institute of Innovative Medicine, Institute of Pharmacology and Toxicology, Zhejiang  
11 Province Key Laboratory of Anti-Cancer Drug Research, College of Pharmaceutical Sciences,  
12 Zhejiang University, Hangzhou, Zhejiang, China;

13 <sup>2</sup>Convalife (Shanghai) Co., Ltd., Shanghai, China;

14 <sup>3</sup>Center for the Study of Itch and Sensory Disorders, Departments of Anesthesiology, Medicine,  
15 Psychiatry, and Developmental Biology, Washington University School of Medicine, St Louis, MO,  
16 USA;

17 <sup>4</sup>The Second Affiliated Hospital, Zhejiang University School of Medicine, Hangzhou, Zhejiang,  
18 China.

19  
20 Haitao Zhang

21 Email: [haitaozhang@zju.edu.cn](mailto:haitaozhang@zju.edu.cn)

22  
23 This PDF file includes:

24  
25 Figures S1 to S6

26 Tables S1 to S5

27

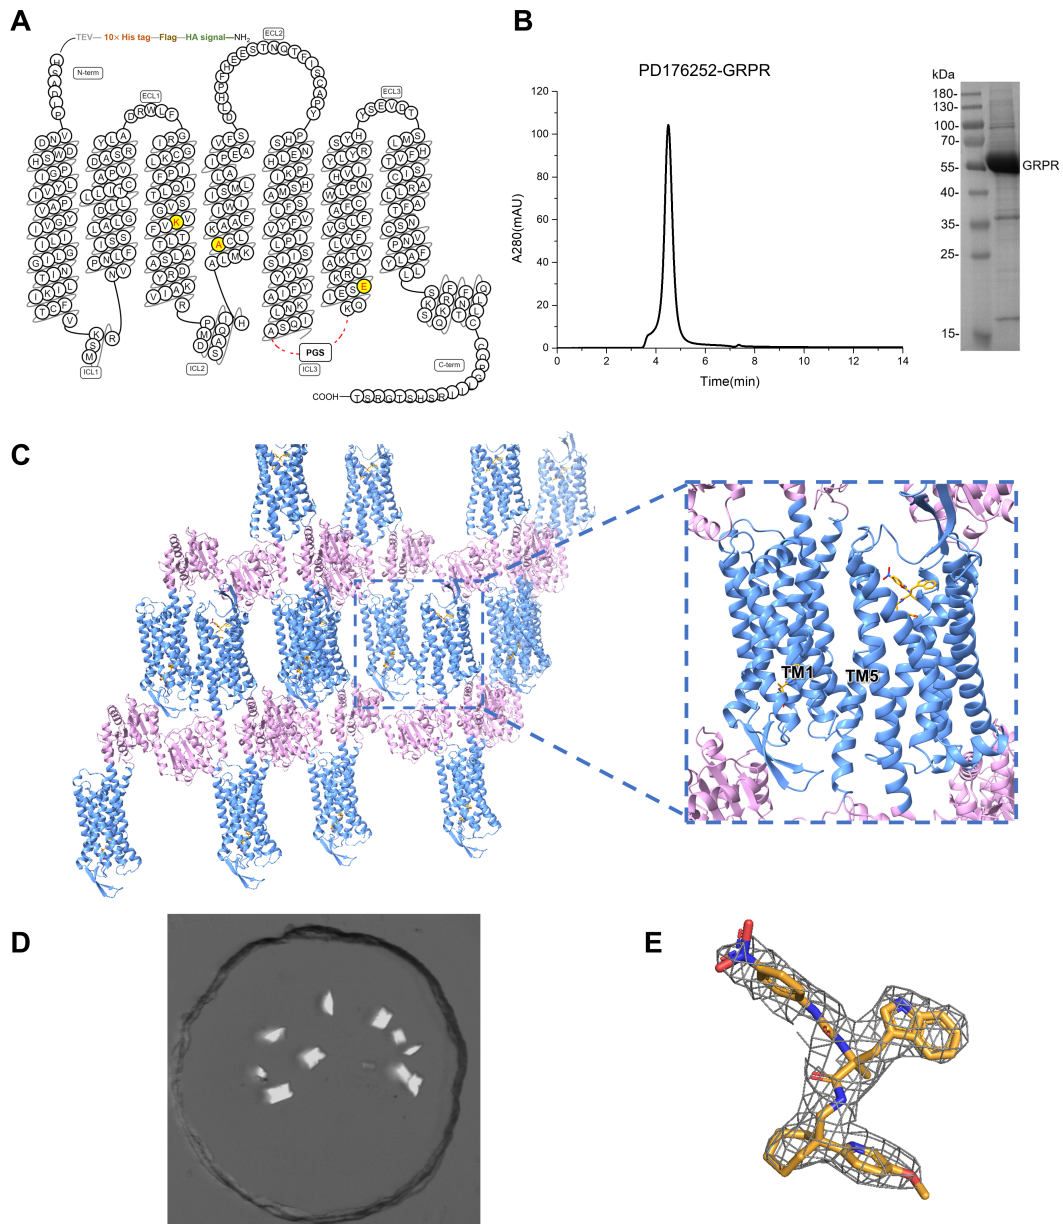

28

29 **Figure S1. Generation of GRPR constructs for crystallography.**

30 (A) Snake plot of the GRPR crystallized construct.

31 (B) Size exclusion chromatography profile and SDS-PAGE analysis of the purified GRPR-  
32 PD176252 proteins.

33 (C) Crystal packing of GRPR-PD176252. GRPR, PD176252, and PGS were shown as blue  
34 ribbons, orange sticks, and plum ribbons, respectively.

35 (D) Image of GRPR-PD176252 crystals grown in lipidic cubic phase.

36 (E)  $|2F_o|-|F_c|$  map (gray mesh) contoured at  $1.0 \sigma$  of the non-peptide antagonist PD176252  
37 (orange).

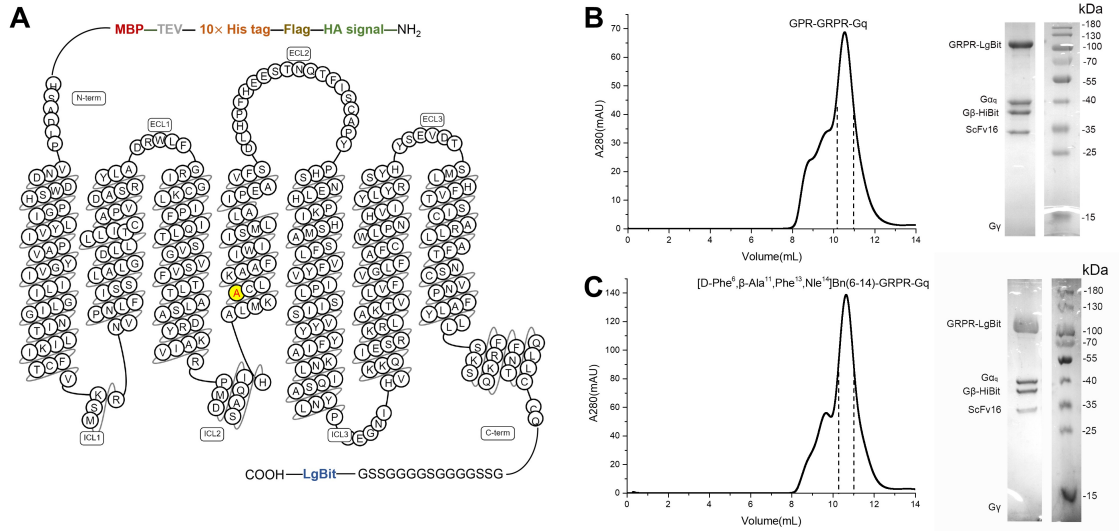

38

39 **Figure S2. Construct design and purification of the GRPR-G<sub>q</sub> proteins with agonists.**

40 (A) Snake plot of the GRPR cryo-EM construct.

41 (B, C) Size-exclusion chromatography elution profile and SDS-PAGE analysis of the purified

42 GRPR-G<sub>q</sub> proteins in complex with GRP (B) and [D-Phe<sup>6</sup>, β-Ala<sup>11</sup>, Phe<sup>13</sup>, Nle<sup>14</sup>] Bn (6-14) (C).

43

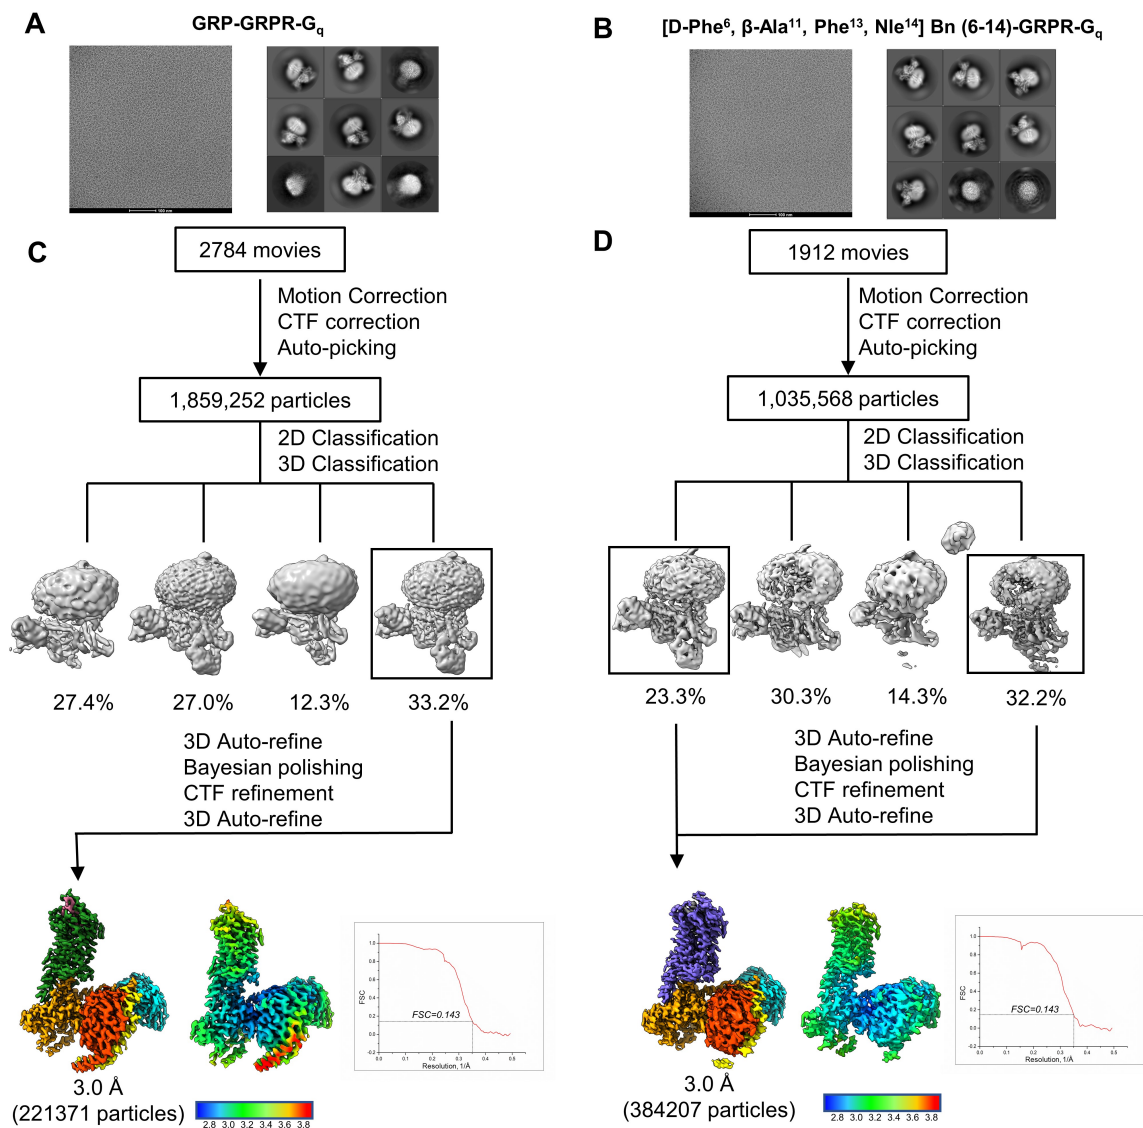

44

45 **Figure S3. Cryo-EM images and data-processing of GRPR-G<sub>q</sub> complex.**

46 (A) Representative cryo-EM micrograph (scale bar, 100 nm) of GRP-GRPR-G<sub>q</sub> complex particles  
 47 imaged at a nominal 73k × magnification and representative two-dimensional class averages.

48 (B) Representative cryo-EM micrograph (scale bar, 100 nm) of [D-Phe<sup>6</sup>, β-Ala<sup>11</sup>, Phe<sup>13</sup>, Nle<sup>14</sup>] Bn  
 49 (6-14)-GRPR-G<sub>q</sub> complex particles imaged at a nominal 73k× magnification and representative  
 50 two-dimensional class averages.

51 (C) Flow chart of the cryo-EM data processing for the GRP-GRPR-G<sub>q</sub> complex.

52 (D) Flow chart of the cryo-EM data processing for the [D-Phe<sup>6</sup>, β-Ala<sup>11</sup>, Phe<sup>13</sup>, Nle<sup>14</sup>] Bn (6-14)-  
 53 GRPR-G<sub>q</sub> complex.

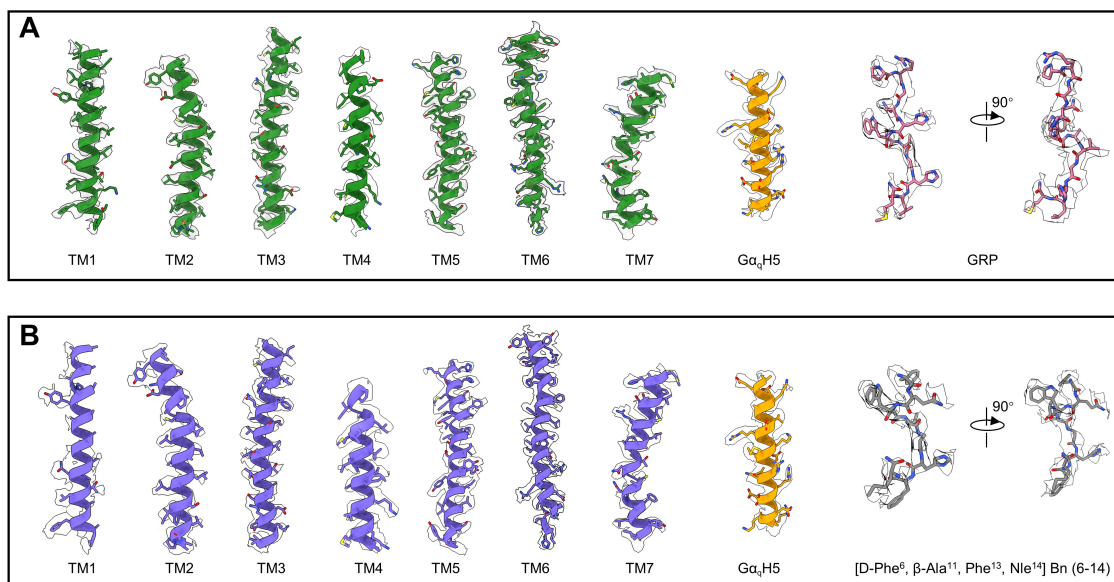

54

55 **Figure S4. The cryo-EM density maps for GRPR-G $\alpha_q$  complexes.**

56 (A) Cryo-EM density maps of TMs1-7, GRP, and  $\alpha 5$  helix of G $\alpha_q$  in the GRP-GRPR-G $\alpha_q$  structure.

57 (B) Cryo-EM density maps of TMs1-7, [D-Phe<sup>6</sup>,  $\beta$ -Ala<sup>11</sup>, Phe<sup>13</sup>, Nle<sup>14</sup>] Bn (6-14), and  $\alpha 5$  helix of G $\alpha_q$

58 in the [D-Phe<sup>6</sup>,  $\beta$ -Ala<sup>11</sup>, Phe<sup>13</sup>, Nle<sup>14</sup>] Bn (6-14)-GRPR-G $\alpha_q$  structure.

59

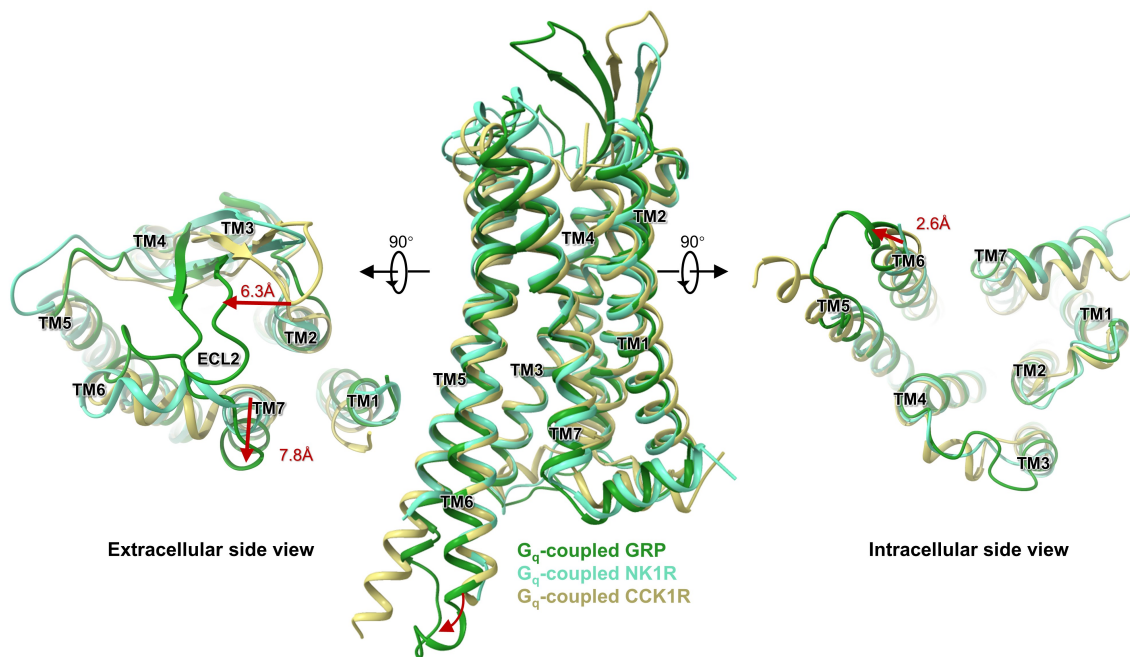

60

61 **Figure S5. Structural comparison of GRPR with G<sub>q</sub>-coupled NK<sub>1</sub>R and CCK<sub>1</sub>R.** Different views  
 62 of the structural superposition of GRPR (forest green), NK<sub>1</sub>R (medium aquamarine, PDB ID: 7RMG),  
 63 and CCK<sub>1</sub>R (dark khaki, PDB ID: 7EZM).

64

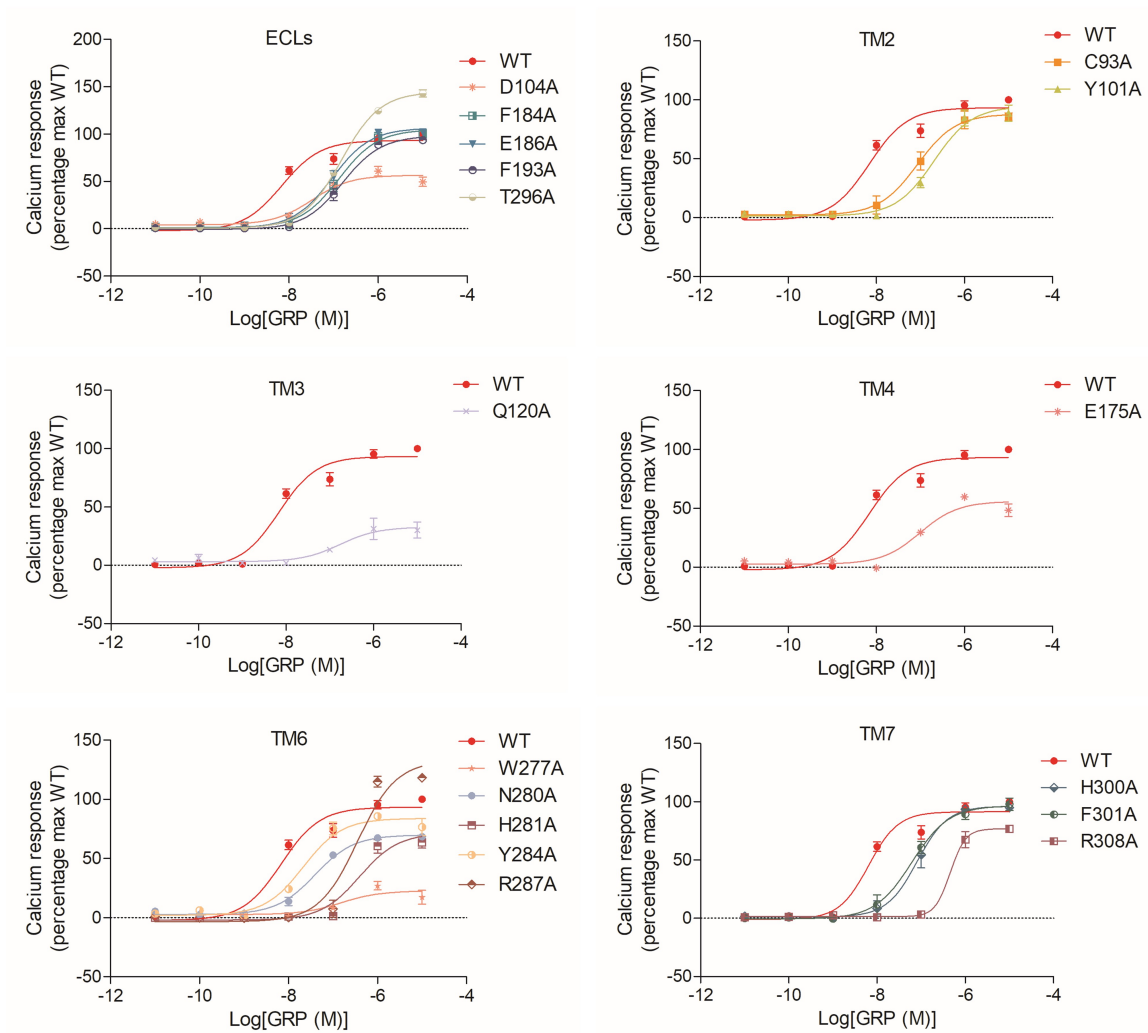

65

66 **Figure S6. Effects of mutations in the ligand-binding pocket of GRPR on the GRP-induced**  
 67 **calcium mobilization.** Data represented the Mean  $\pm$  S.E.M., n=3 independent replicates. WT  
 68 represented wild type. Source data are provided as a Source Data file.

69

70 **Table S1. Crystallographic data collection and refinement statistics**

|                                        | <b>GRPR-PD176252</b>    |
|----------------------------------------|-------------------------|
| <b>PDB ID</b>                          | 7W41                    |
| <b>Data collection</b>                 |                         |
| Space group                            | C 1 2 1                 |
| Cell dimensions                        |                         |
| a, b, c (Å)                            | 134.104, 60.025, 98.489 |
| $\alpha$ , $\beta$ , $\gamma$ (°)      | 90.00, 113.57, 90.00    |
| Resolution (Å)                         | 50.00-2.95 (3.06-2.95)  |
| $R_{merge}$                            | 0.151 (0.599)           |
| $I/\sigma I$                           | 8.14 (1.11)             |
| CC*                                    | 0.994 (0.908)           |
| Completeness (%)                       | 96.9 (95.8)             |
| Redundancy                             | 4.0 (3.5)               |
| <b>Refinement</b>                      |                         |
| Resolution (Å)                         | 27.75-2.95 (3.06-2.95)  |
| No. reflections                        | 14,788 (1,449)          |
| $R_{work} / R_{free}$                  | 0.281/0.286             |
| No. atoms                              | 3,909                   |
| Average $B$ -factors (Å <sup>2</sup> ) | 88.4                    |
| R.m.s. deviations                      |                         |
| Bond lengths (Å)                       | 0.01                    |
| Bond angles (°)                        | 1.56                    |
| Ramachandran plot (%)                  |                         |
| Favored                                | 98.35                   |
| Allowed                                | 1.65                    |
| Disallowed                             | 0                       |

71 #Data from 4 crystal were used to solve the structure.

72 \*Highest resolution shell was shown in parenthesis.

73



74 **Table S2. Effects of mutagenesis in the ligand-binding pocket of GRPR on the GRP-**  
 75 **induced calcium mobilization.**  $E_{max}$  and  $pEC_{50}$  values were presented as Mean  $\pm$  S.E.M. from  
 76 three independent experiments. Source data are provided as a Source Data file.

| Mutations | Locations | $E_{max}$        | $pEC_{50}$      |
|-----------|-----------|------------------|-----------------|
| WT        |           | 93.38 $\pm$ 4.24 | 8.16 $\pm$ 0.10 |
| C93A      | 2.57      | 88.01 $\pm$ 2.54 | 7.07 $\pm$ 0.06 |
| Y101A     | 2.65      | 94.52 $\pm$ 3.11 | 6.70 $\pm$ 0.07 |
| D104A     | ECL1      | 56.51 $\pm$ 3.35 | 7.48 $\pm$ 0.15 |
| Q120A     | 3.32      | 32.70 $\pm$ 3.17 | 6.76 $\pm$ 0.23 |
| E175A     | 4.60      | 55.59 $\pm$ 4.28 | 7.01 $\pm$ 0.17 |
| F184A     | ECL2      | 104.8 $\pm$ 2.38 | 6.87 $\pm$ 0.05 |
| E186A     | ECL2      | 98.11 $\pm$ 2.68 | 6.80 $\pm$ 0.06 |
| F193A     | ECL2      | 106.4 $\pm$ 2.32 | 7.04 $\pm$ 0.05 |
| W277A     | 6.48      | 22.57 $\pm$ 3.35 | 6.82 $\pm$ 0.35 |
| N280A     | 6.51      | 69.84 $\pm$ 1.87 | 7.40 $\pm$ 0.07 |
| H281A     | 6.52      | 83.91 $\pm$ 3.84 | 7.67 $\pm$ 0.11 |
| Y284A     | 6.55      | 71.42 $\pm$ 4.76 | 6.40 $\pm$ 0.13 |
| R287A     | 6.58      | 132.6 $\pm$ 7.90 | 6.45 $\pm$ 0.12 |
| T296A     | ECL3      | 143.7 $\pm$ 3.01 | 6.83 $\pm$ 0.08 |
| H300A     | 7.31      | 96.16 $\pm$ 3.08 | 7.09 $\pm$ 0.21 |
| F301A     | 7.32      | 96.61 $\pm$ 3.00 | 7.21 $\pm$ 0.12 |
| R308A     | 7.39      | 76.79 $\pm$ 1.78 | 6.34 $\pm$ 0.48 |

77

78 **Table S3. Effects of the GRPR-G<sub>q</sub> cryo-EM constructs on the GRP-induced calcium**  
 79 **mobilization.**  $E_{max}$  and pEC50 values were presented as Mean  $\pm$  S.E.M. from three independent  
 80 experiments. Source data are provided as a Source Data file.

| <b>GRPR</b> | <b>G<sub>q</sub></b> | <b><math>E_{max}</math></b> | <b>pEC<sub>50</sub></b> |
|-------------|----------------------|-----------------------------|-------------------------|
| WT          | WT                   | 93.38 $\pm$ 4.24            | 8.16 $\pm$ 0.10         |
| Cryo-EM     | WT                   | 97.68 $\pm$ 3.75            | 7.78 $\pm$ 0.09         |
| WT          | Cryo-EM              | 79.49 $\pm$ 2.68            | 6.60 $\pm$ 0.07         |
| Cryo-EM     | Cryo-EM              | 89.69 $\pm$ 4.83            | 6.38 $\pm$ 0.11         |

81

82 **Table S4. Effects of the E186<sup>ECL2</sup>A in GRPR on the [D-Phe<sup>6</sup>,  $\beta$ -Ala<sup>11</sup>, Phe<sup>13</sup>, Nle<sup>14</sup>] Bn (6-14)**  
83 **induced calcium mobilization.** Data are presented as the Mean  $\pm$  S.E.M. (n = 3) of three  
84 independent experiments performed in triplicate.

| <b>Mutations</b> | <b>Locations</b> | <b><math>E_{max}</math></b> | <b>pEC<sub>50</sub></b> |
|------------------|------------------|-----------------------------|-------------------------|
| WT               |                  | 90.28 $\pm$ 4.42            | 7.82 $\pm$ 0.16         |
| E186A            | ECL2             | 95.69 $\pm$ 3.74            | 8.02 $\pm$ 0.12         |

85

86 **Table S5. Cryo-EM data collection and refinement statistics of the GRP-GRPR and GRPR-**  
 87 **[D-Phe<sup>6</sup>, βAla<sup>11</sup>, Phe<sup>13</sup>, Nle<sup>14</sup>] Bn (6-14) complex structures**

|                                                  | <b>GRPR-G<sub>q</sub>-GRP</b> | <b>GRPR-G<sub>q</sub>- [D-Phe<sup>6</sup>, βAla<sup>11</sup>, Phe<sup>13</sup>, Nle<sup>14</sup>] Bn (6-14)</b> |
|--------------------------------------------------|-------------------------------|-----------------------------------------------------------------------------------------------------------------|
| <b>PDB ID/EMDB ID</b>                            | 7W3Z/EMD-32297                | 7W40/EMD-32298                                                                                                  |
| <b>Data collection and processing</b>            |                               |                                                                                                                 |
| Magnification                                    | 29000×                        | 29000×                                                                                                          |
| Voltage (kV)                                     | 300                           | 300                                                                                                             |
| Electron exposure (e-/Å <sup>2</sup> )           | 64                            | 64                                                                                                              |
| Defocus range (μm)                               | -1.1~-1.3                     | -1.10~-1.25                                                                                                     |
| Pixel size (Å)                                   | 1.014                         | 0.507                                                                                                           |
| Symmetry imposed                                 | C1                            | C1                                                                                                              |
| Initial particle projections (no.)               | 1,859,252                     | 1,380,329                                                                                                       |
| Final particle projections (no.)                 | 577,387                       | 222,542                                                                                                         |
| Map resolution (Å)                               | 3.0                           | 3.0                                                                                                             |
| FSC threshold                                    | 0.143                         | 0.143                                                                                                           |
| Map resolution range (Å)                         | 2.5-4.5                       | 2.5-4.5                                                                                                         |
| <b>Refinement</b>                                |                               |                                                                                                                 |
| Initial model used                               | 7F6G                          | 7F6G                                                                                                            |
| Model resolution (Å)                             | 3.1                           | 3.2                                                                                                             |
| FSC threshold                                    | 0.5                           | 0.5                                                                                                             |
| Map sharpening <i>B</i> factor (Å <sup>2</sup> ) | 83.24929                      | 80.24929                                                                                                        |
| Model composition                                |                               |                                                                                                                 |
| Non-hydrogen atoms                               | 10,221                        | 9,236                                                                                                           |
| Protein residues                                 | 1,295                         | 1,176                                                                                                           |
| <i>B</i> factors (Å <sup>2</sup> )               | 46.99                         | 42.65                                                                                                           |
| R.m.s. deviations                                |                               |                                                                                                                 |
| Bond lengths (Å)                                 | 0.010                         | 0.010                                                                                                           |
| Bond angles (°)                                  | 1.359                         | 1.383                                                                                                           |
| Validation                                       |                               |                                                                                                                 |
| MolProbity score                                 | 1.56                          | 1.74                                                                                                            |
| Clashscore                                       | 5.90                          | 7.11                                                                                                            |
| Rotamer outliers (%)                             | 1.52                          | 1.93                                                                                                            |
| Ramachandran plot                                |                               |                                                                                                                 |
| Favored (%)                                      | 97.50                         | 97.41                                                                                                           |
| Allowed (%)                                      | 2.50                          | 2.59                                                                                                            |

|                |   |   |
|----------------|---|---|
| Disallowed (%) | 0 | 0 |
|----------------|---|---|

88
